# Supplementary material
Source: MDPI journal article supplement (https://www.mdpi.com/2304-6740/10/6/81)
Supplement: s1 [file s1]

# **Enhancing the performance of ceramic rich polymer composite electrolytes using polymer grafted LLZO**

*Pierre Ranque,<sup>1</sup> Jakub Zagórski,<sup>1,2</sup> Gracia Accardo,<sup>1</sup> Ander Orue,<sup>1</sup> Juan Miguel López del Amo,<sup>1</sup> Nicola Boaretto,<sup>1</sup> Maria Martinez Ibañez,<sup>1</sup> Hugo Arrou-Vignod,<sup>1</sup> Frederic Aguesse,<sup>1</sup> Michel Armand,<sup>1</sup> Shanmukaraj Devaraj,<sup>1\*</sup>*

*<sup>1</sup>Centro de Investigación Cooperativa de Energías Alternativas (CIC energiGUNE), Basque Research and Technology Alliance (BRTA), Parque Tecnológico de Alava, Albert Einstein 48, 01510 Vitoria-Gasteiz, Spain.*

*<sup>2</sup>University of the Basque Country (UPV/EHU), Barrio Sarriena, s/n, 48940 Leioa, Spain.*

*<sup>3</sup>Departamentos de Química Aplicada y Ciencia y Tecnología de Polímeros de la Facultad de Química de San Sebastián, Spain.*

*\*E-mail: [dshanmukaraj@cicenergigune.com](mailto:dshanmukaraj@cicenergigune.com)*

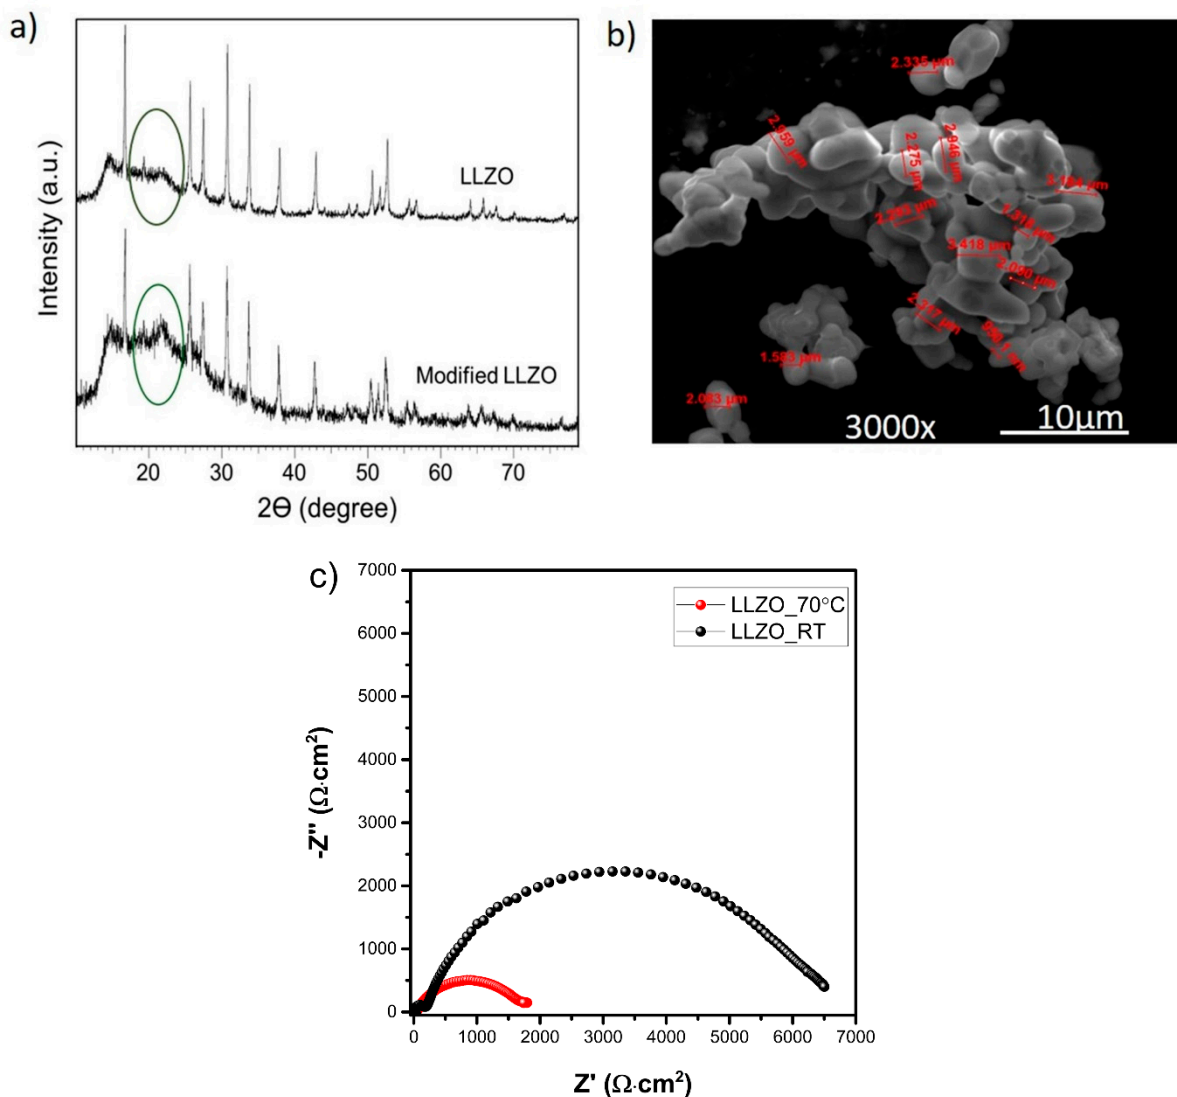

**Figure S1** a) Powder X-ray diffraction patterns of the pure cubic Ga-substituted LLZO ( $\text{Li}_{6.55}\text{Ga}_{0.15}\text{La}_3\text{Zr}_2\text{O}_{12}$ ) powder without (top) and with (bottom) grafted PEG showing the presence of PEG (green circles) in the grafted LLZO; b) SEM image of the LLZO particles and c) Nyquist plot of LLZO pellet taken at RT and 70 °C with Li electrodes.

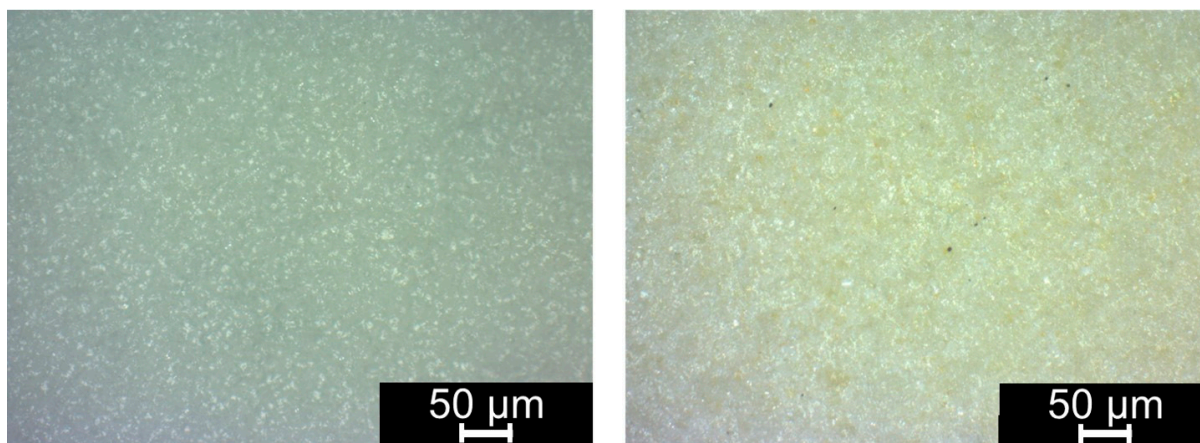

**Figure S2** Optical microscope images of PEO:LiTFSI + 30 vol% LLZO membranes without (left) and with (right) LLZO modification.

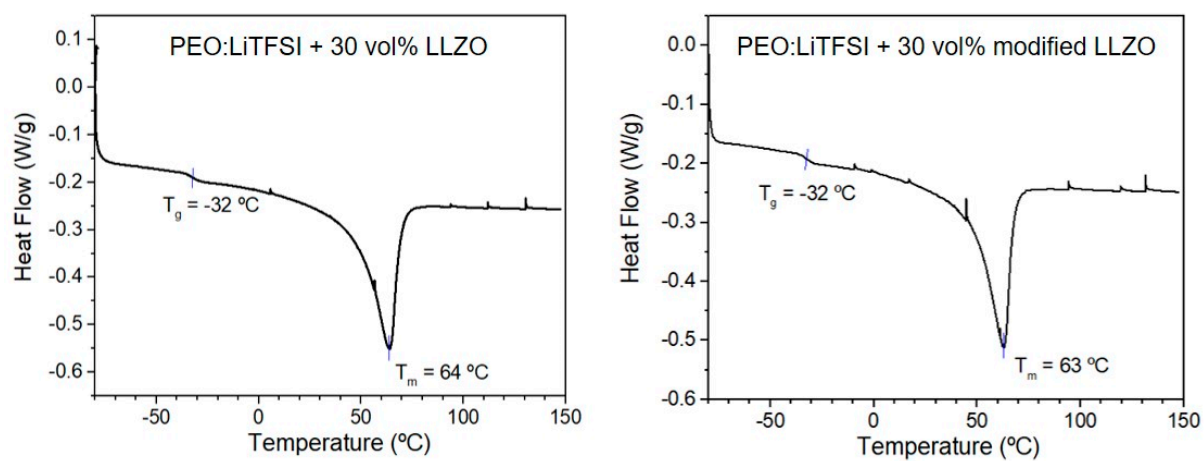

**Figure S3** Differential scanning calorimetry curves of PEO:LiTFSI + 30 vol% LLZO (left) and PEO:LiTFSI + 30 vol% modified LLZO (right).

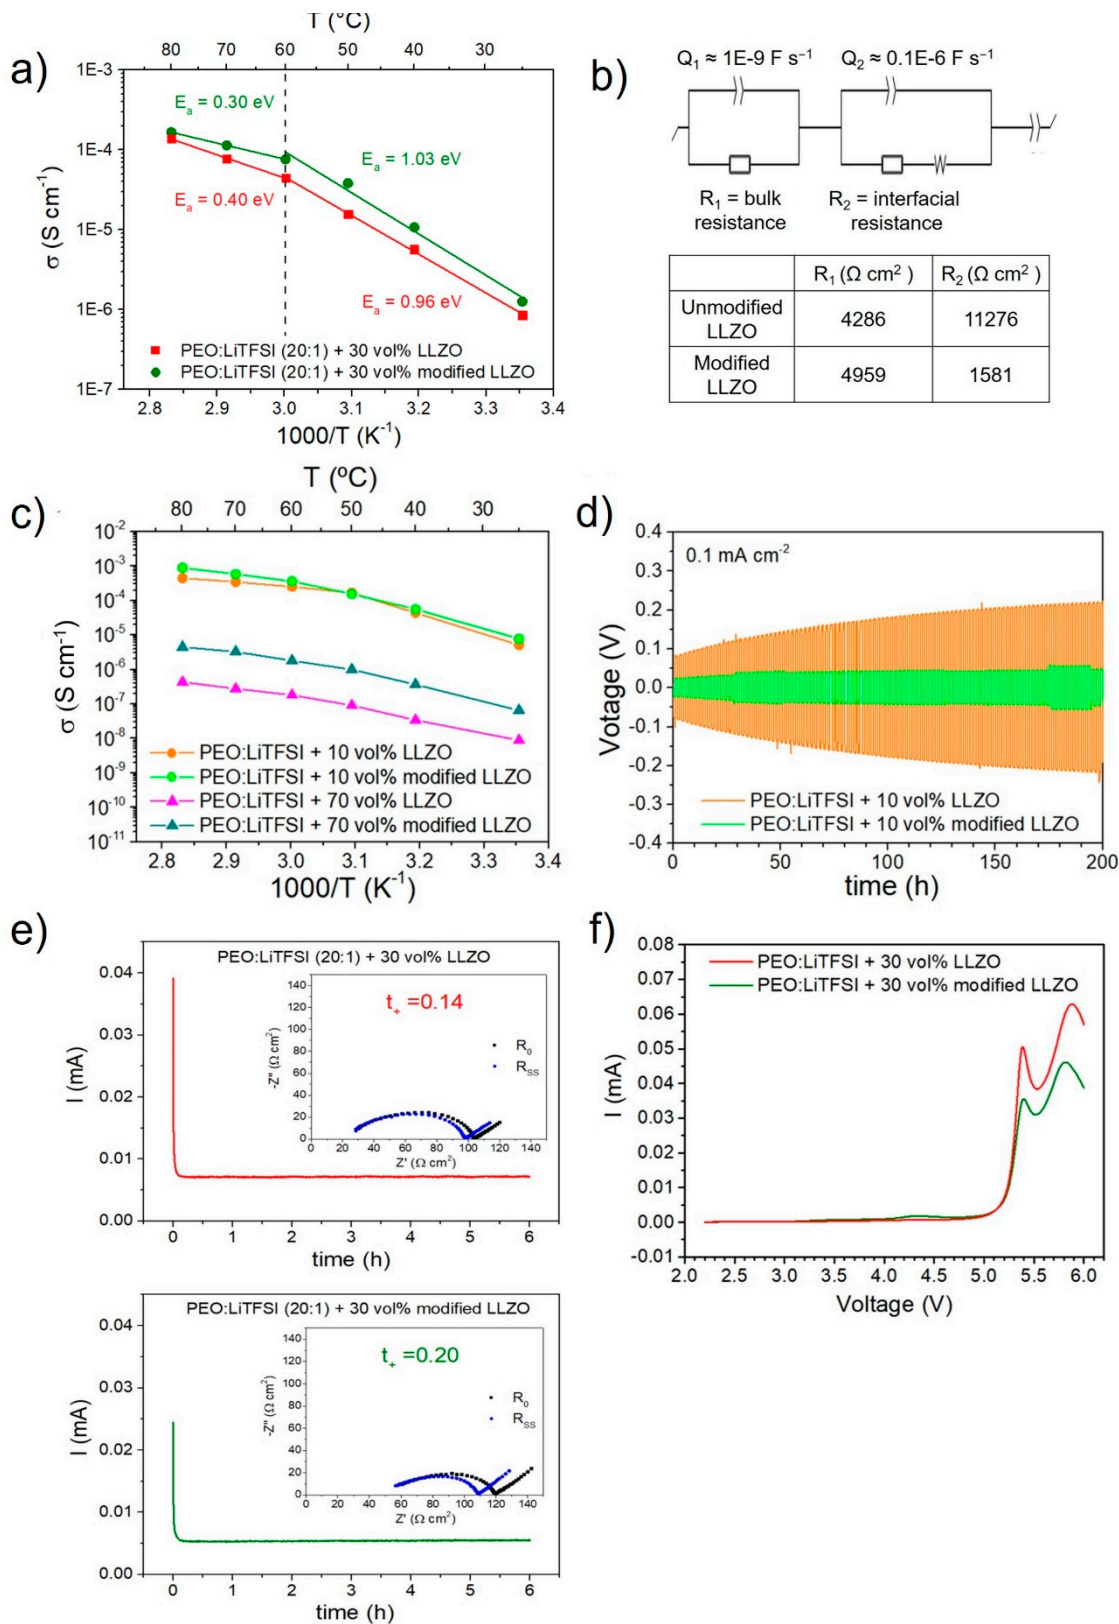

**Figure S4** a) Arrhenius plots of PEO:LiTFSI + 30 vol% LLZO composite membranes with the corresponding activation energies above and below PEO:LiTFSI (20:1) melting point ( $60^{\circ}\text{C}$ );

b) equivalent circuit and resistances calculated by fitting for Nyquist plots at 25 °C of PEO:LiTFSI +30 vol% unmodified and modified LLZO electrolytes; c) Arrhenius plots of 10 and 70 vol% LLZO composite membranes; d) Plating/stripping measurements of 10 vol% LLZO composite membranes at 70 °C; e) Li-ion transference number ( $t_{Li^+}$ ) measurements of PEO:LiTFSI + 30 vol% LLZO (up) and PEO:LiTFSI + 30 vol% modified LLZO (down) at 70 °C; f) Linear sweep voltammetry curves of PEO:LiTFSI + 30 vol% LLZO composite membranes at 70 °C.
